# Supplementary material for: Low-Carbohydrate Diet Inhibits Different Advanced Glycation End Products in Kidney Depending on Lipid Composition but Causes Adverse Morphological Changes in a Non-Obese Model Mice
Source: PubMed Central journal article supplement (PMC6893679; doi:10.3390/nu11112801), 2019-11-16
Supplement: nutrients-11-02801-s001.pdf [file nutrients-11-02801-s001.pdf]

**Table S1.** Composition of the experimental diets. Control (control diet); LC (low-carbohydrate diet); MCT-LC (LC diet containing medium-chain triglyceride).

|                      | Control | LC    | MCT-LC |
|----------------------|---------|-------|--------|
| PFC energy ratio (%) |         |       |        |
| Carbohydrate         | 64      | 20    | 20     |
| Protein              | 20      | 35    | 35     |
| Fat                  | 16      | 45    | 45     |
| Energy (kcal/g)      | 4.0     | 4.0   | 4.0    |
| Ingredient(g/kg)     |         |       |        |
| Casein               | 200.0   | 345.0 | 345.0  |
| Cornstarch           | 397.5   | 0     | 0      |
| Maltodextrin 10      | 132.0   | 132.0 | 132.0  |
| Sucrose              | 100.0   | 64.9  | 64.9   |
| cellulose            | 50.0    | 50.0  | 50.0   |
| Soybean oil          | 70.0    | 70.0  | 70.0   |
| Lard                 | 0.0     | 130.0 | 0      |
| MCT oil              | 0.0     | 0.0   | 130.0  |
| Mineral mix S10022G  | 35.0    | 0.0   | 0.0    |
| Mineral mix S10022C  | 0.0     | 3.5   | 3.5    |
| Calcium carbonate    | 0.0     | 12.5  | 12.5   |
| Potassium citrate    | 0.0     | 6.5   | 6.5    |
| Potassium phosphate  | 0.0     | 1.8   | 1.8    |
| Sodium chloride      | 0.0     | 2.6   | 2.6    |
| Vitamin mix V10037   | 10.0    | 10.0  | 10.0   |
| L-Cystine            | 3.0     | 5.2   | 5.2    |
| Choline bitartrate   | 2.5     | 2.5   | 2.5    |
| t-Butylthdroquinone  | 0.014   | 0.014 | 0.014  |

Control, control diet; LC, low-carbohydrate diet high in lard; MCT-LC, low-carbohydrate diet high in medium-chain triglyceride.
